# Supplementary material for: Synapse transistors based on Li7La3Zr2O12 (LLZO) nanofibers/polyvinyl alcohol (PVA) composite gate dielectric for neuromorphic application
Source: Royal Society of Chemistry journal article supplement (doi:10.1039/d2tc01946a), 2022-01-01
Supplement: d2tc01946a1.pdf [file d2tc01946a1.pdf]

## Supporting Information

# Synapse transistors based on $\text{Li}_7\text{La}_3\text{Zr}_2\text{O}_{12}$ nanofibers/ polyvinyl alcohol (PVA) composite gate dielectric for neuromorphic application

Yuxing Lei,<sup>a</sup> Jun Li,<sup>a,b\*</sup> Wenhui Fu,<sup>a</sup> and Jianhua Zhang<sup>b</sup>

<sup>1</sup>School of Material Science and Engineering, Shanghai University, Jiading, Shanghai 201800, People's Republic of China.

<sup>2</sup>Key Laboratory of Advanced Display and System Applications, Ministry of Education, Shanghai University, Shanghai 200072, People's Republic of China

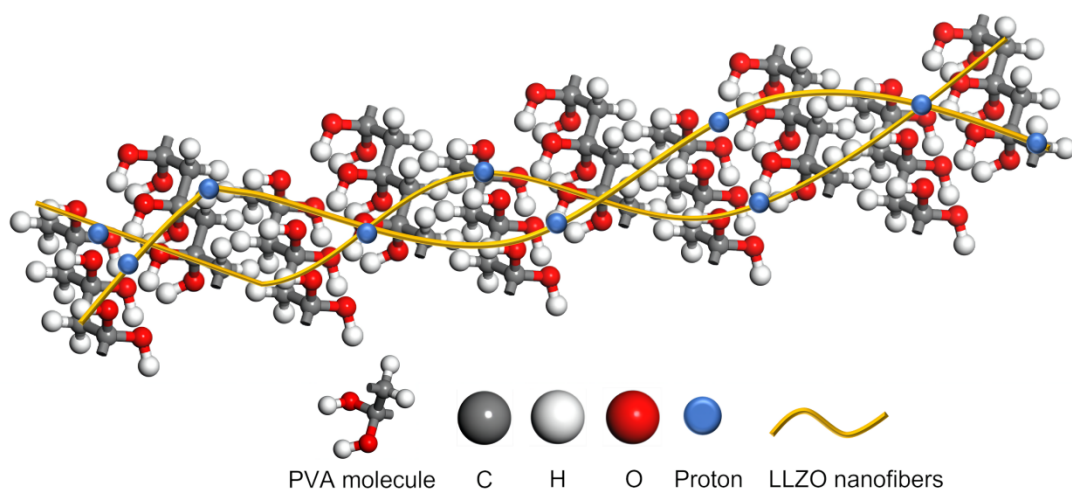

**Figure S1** Schematic diagram of LLZO nanofibers adding ionic conductivity in PVA

\* Corresponding author: Jun Li. E-mail: lijun\_yt@shu.edu.cn

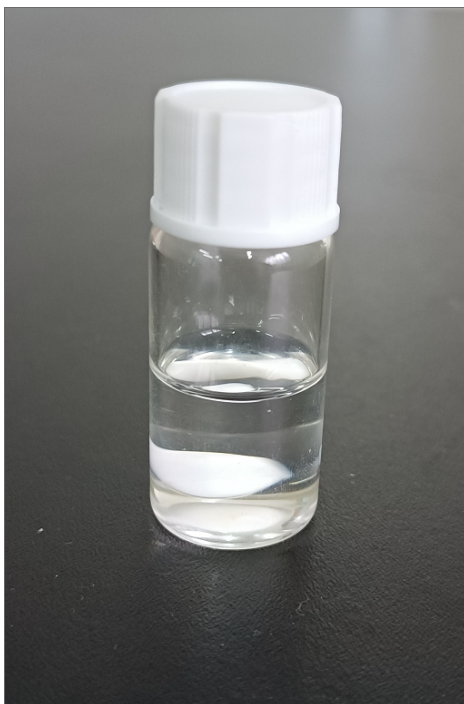

Figure S2 LLZO precursor solution

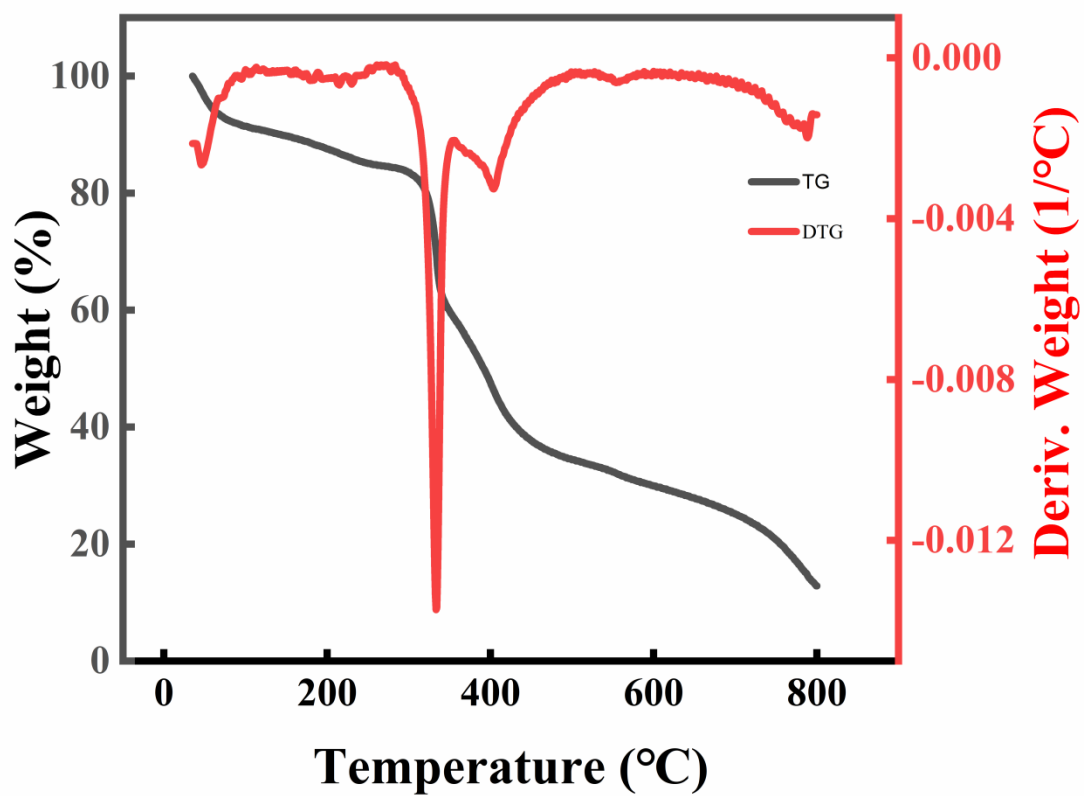

Figure S3 Thermogravimetric analysis of LLZO precursor solution

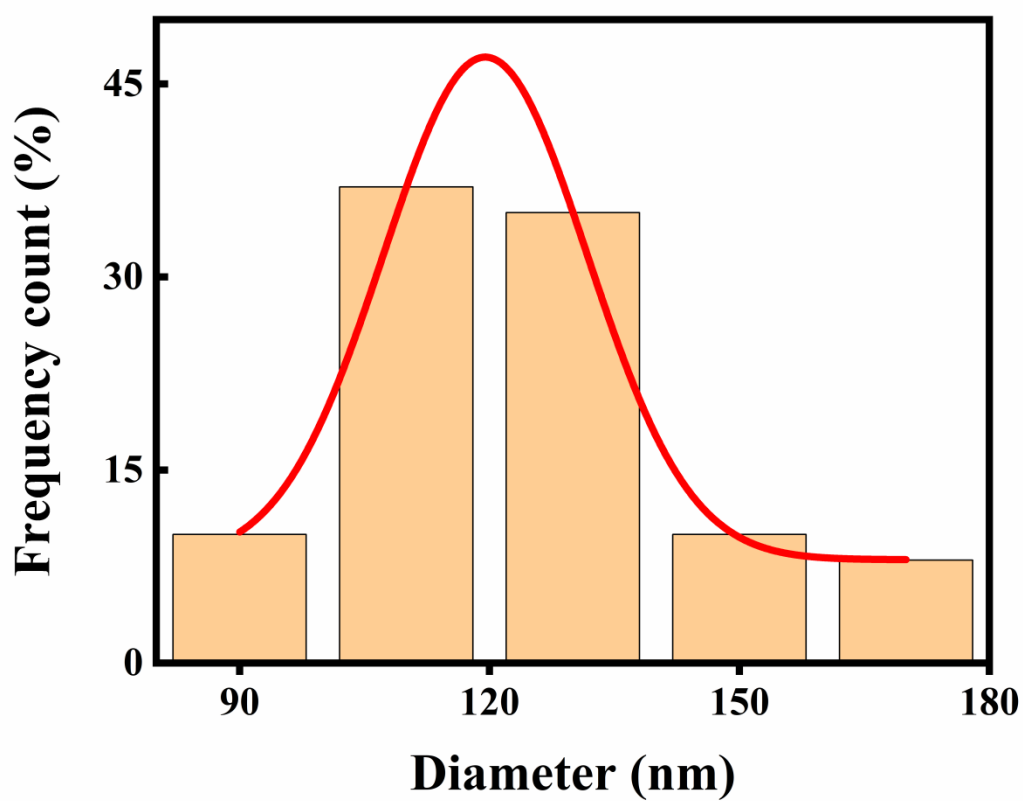

Figure S4 Diameter distribution of LLZO nanofibers

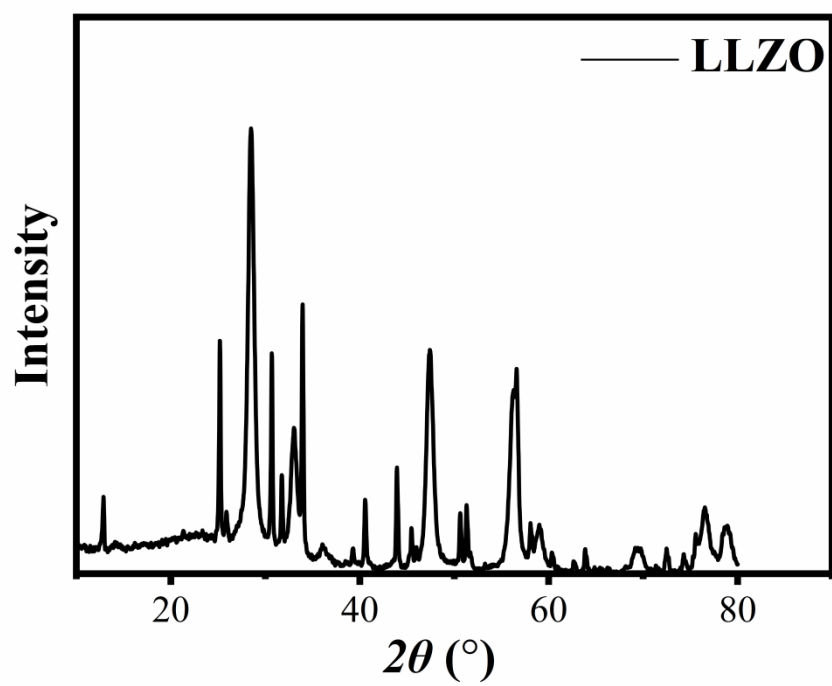

Figure S5 XRD of LLZO nanofibers

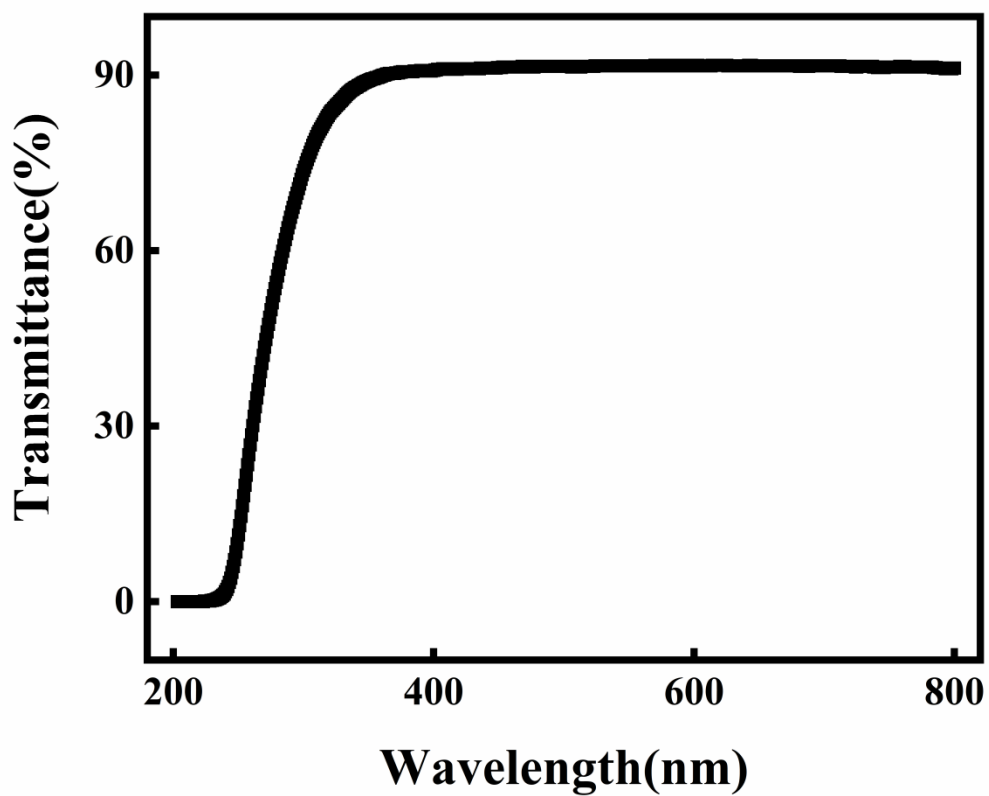

Figure S6 Light transmission of LLZO/PVA complex electrolyte film

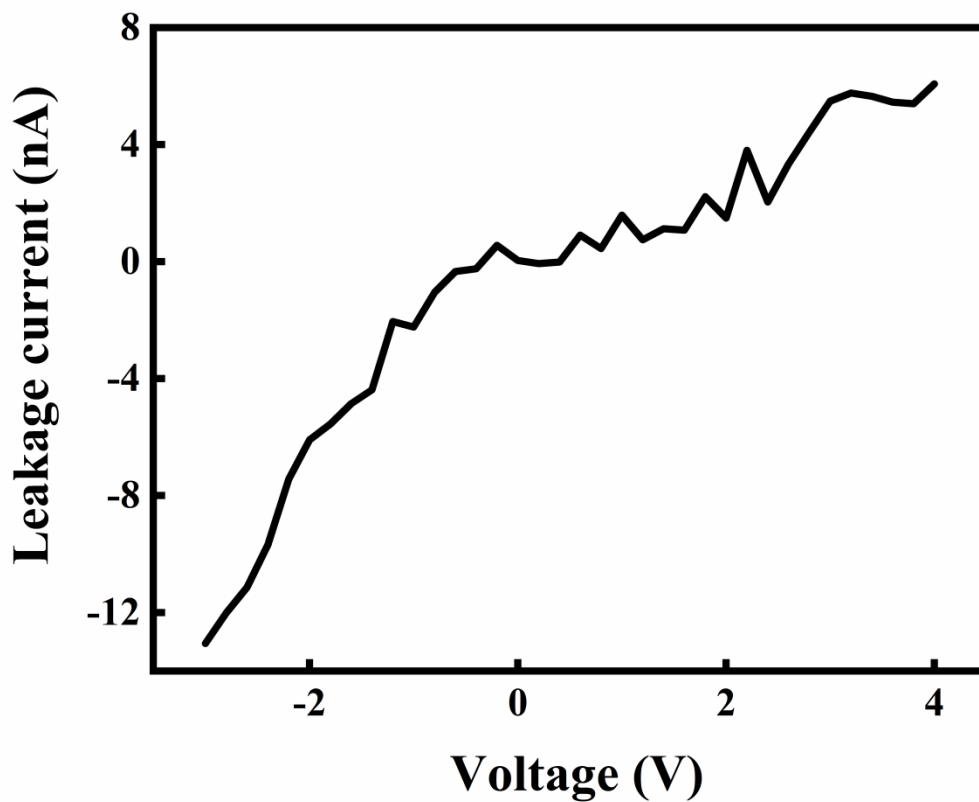

Figure S7 Leakage current of LLZO/PVA complex electrolyte film

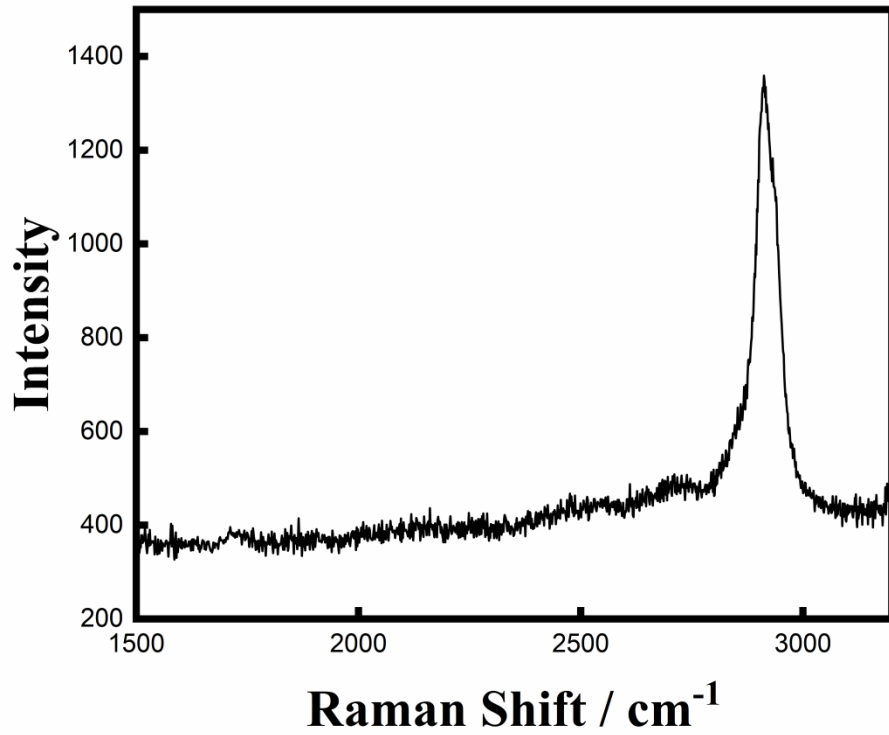

Figure S8 Raman spectra of PVA/LLZO complex electrolyte film

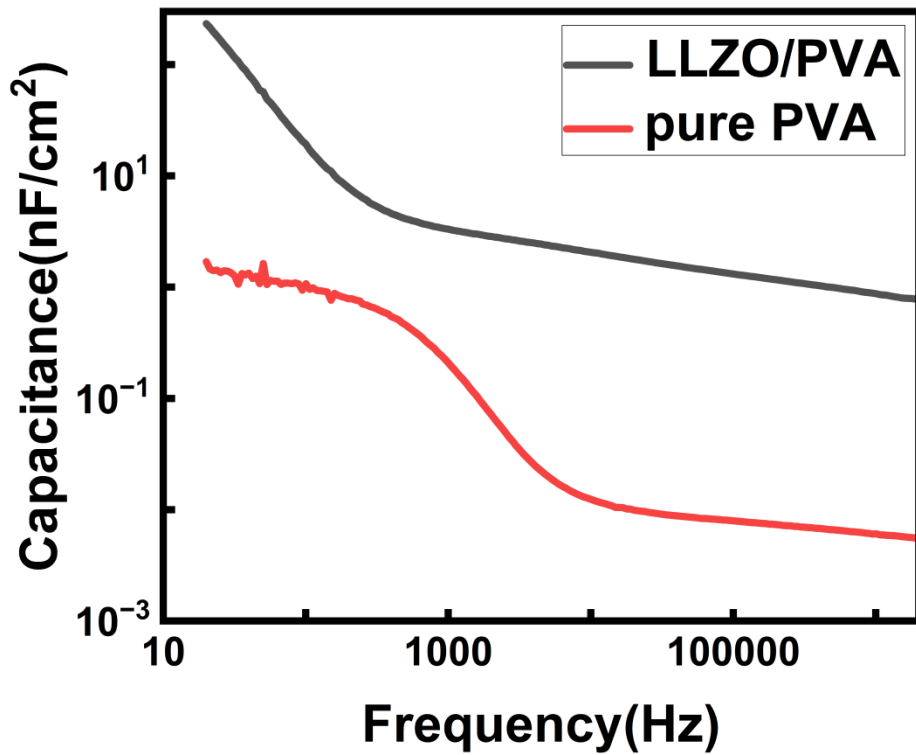

Figure S9 Comparison on the capacitance-frequency between LLZO/PVA

composite dielectric and pure PVA hydrogel dielectric

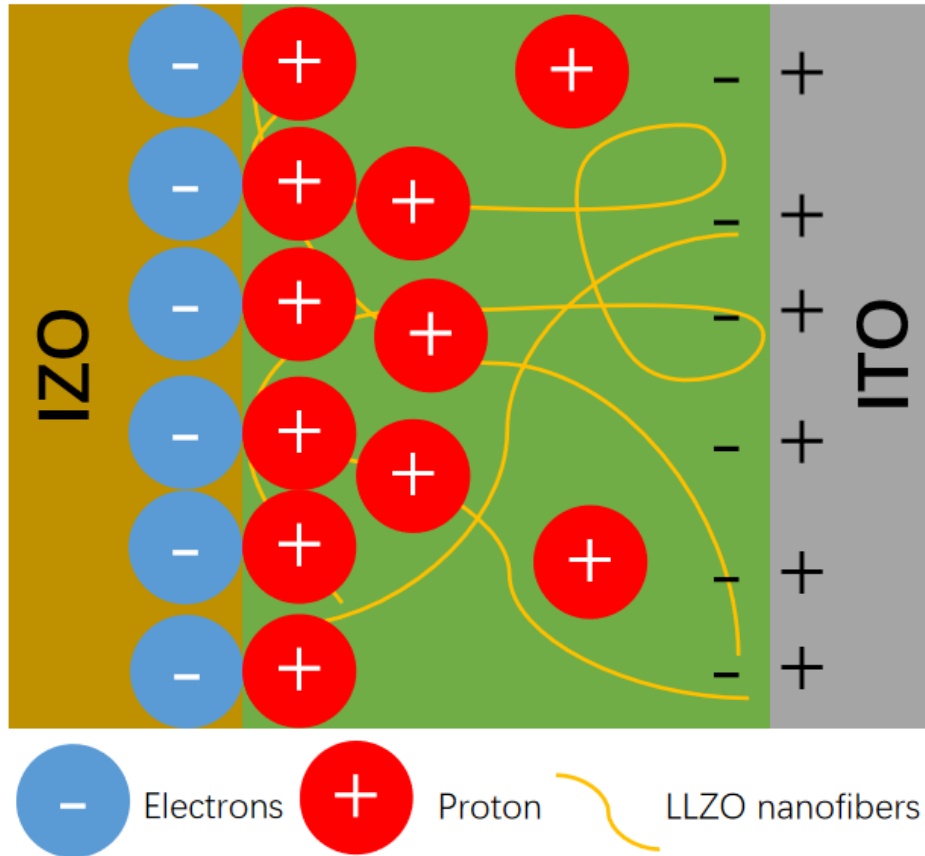

**Figure S10** Schematic diagram of proton migration in PVA when voltages applied

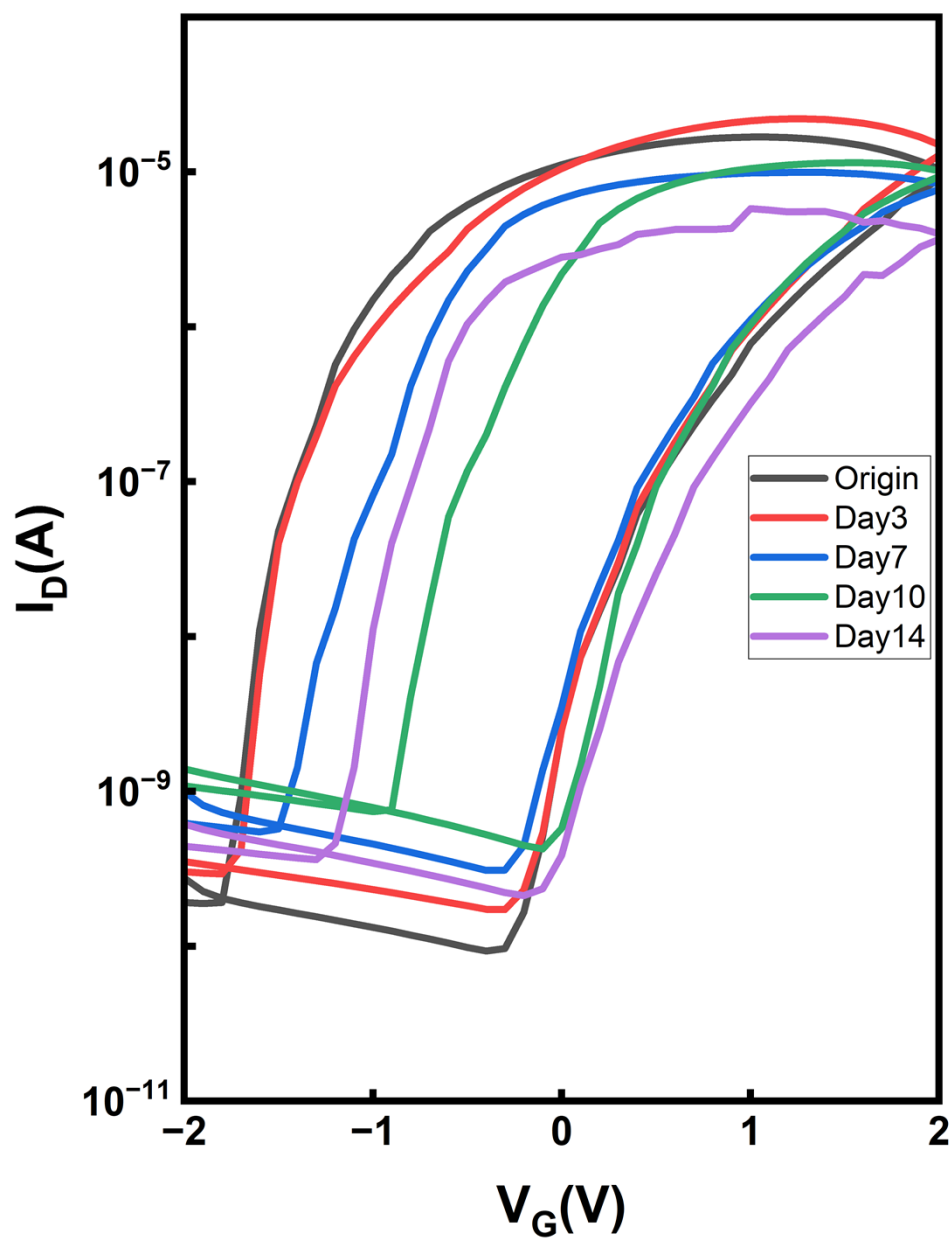

**Figure S11** Time dependent forward scan and reverse scan transfer curves of the synapse transistors after 3,7,10,14 days

**Table S1** Previously reported PPF of synaptic transistors based on other solid

electrolytes

| Dielectric layer     | Active layer              | $\Delta t$ | PPF   | Ref.      |
|----------------------|---------------------------|------------|-------|-----------|
| Graphite oxide       | IZO                       | 20 ms      | 2.0   | 1         |
| Chitosan             | IZO                       | 10 ms      | 1.8   | 2         |
| Starch               | IZO                       | 15 ms      | 1.8   | 3         |
| SiO <sub>2</sub>     | CsPbBr <sub>3</sub> /TIPS | 1 s        | ~1.33 | 4         |
| PVA                  | Al-Zn-O(AZO)              | 40 ms      | ~1.37 | 5         |
| PVA/SiO <sub>2</sub> | Carbon Nanotubes          | 150 ms     | 1.7   | 6         |
| PVA                  | IZO                       | 1 s        | 1.89  | This work |

**References**

- 1 S. Qin, F. Wang, Y. Liu, Q. Wan, X. Wang, Y. Xu, Y. Shi, X. Wang and R. Zhang, *2D Materials*, 2017, **4**, 035022.
- 2 N. Liu, L. Q. Zhu, P. Feng, C. J. Wan, Y. H. Liu, Y. Shi and Q. Wan, *Scientific Reports*, 2015, **5**, 18082.
- 3 Y. H. Yang, J. Li, Q. Chen, Y. H. Zhou, W. Q. Zhu and J. H. Zhang, *Organic Electronics*, , DOI:10.1016/j.orgel.2019.105518.
- 4 J. Liu, Z. Yang, Z. Gong, Z. Shen, Y. Ye, B. Yang, Y. Qiu, B. Ye, L. Xu, T. Guo and S. Xu, *ACS Applied Materials and Interfaces*, 2021, **13**, 13362–13371.
- 5 Y. Zhao, G. Feng and J. Jiang, *Solid-State Electronics*, , DOI:10.1016/j.sse.2020.107767.
- 6 Y. Wang, W. Huang, Z. Zhang, L. Fan, Q. Huang, J. Wang, Y. Zhang and M. Zhang, *Nanoscale*, 2021, **13**, 11360–11369.
